# Supplementary material for: Single molecule magnet behavior observed in a 1-D dysprosium chain with quasi-D5h symmetry
Source: Royal Society of Chemistry journal article supplement (doi:10.1039/c5dt04147c), 2015-01-01
Supplement: c5dt04147c1.pdf [file c5dt04147c1.pdf]

Electronic Supplementary Information (ESI) for:

## Single Molecule Magnet Behavior Observed in 1-D Dysprosium Chain with quasi- $D_{5h}$ Symmetry

Xing-Cai Huang,<sup>a,b</sup> Ming Zhang,<sup>a</sup> Dayu Wu,<sup>\*a</sup> Dong Shao,<sup>b</sup> Xin-Hua Zhao,<sup>b</sup> Wei Huang<sup>a</sup> and Xin-Yi Wang<sup>\*b</sup>

<sup>a</sup> Jiangsu Key Laboratory of Advanced Catalytic Materials and Technology, Collaborative Innovation Center of Advanced Catalysis & Green Manufacturing, School of Petrochemical Engineering, Changzhou University, Changzhou, Jiangsu 213164, China;

<sup>b</sup> State Key Laboratory of Coordination Chemistry, Collaborative Innovation Center of Advanced Microstructures, School of Chemistry and Chemical Engineering, Nanjing University, Nanjing, 210093, China

E-mail: wudy@cczu.edu.cn, wangxy66@nju.edu.cn

### Table of contents

|                                                                                                                                                                                                                                                                |     |
|----------------------------------------------------------------------------------------------------------------------------------------------------------------------------------------------------------------------------------------------------------------|-----|
| Experimental Section                                                                                                                                                                                                                                           | S2  |
| Physical Measurements                                                                                                                                                                                                                                          | S4  |
| X-ray data collection, structure solution and refinement for <b>1</b> and <b>2</b> .                                                                                                                                                                           | S4  |
| <b>Figure S1.</b> The powder XRD patterns for compound <b>1</b> and <b>2</b> .                                                                                                                                                                                 | S5  |
| <b>Figure S2.</b> The crystal packing of <b>1</b> ( <b>a</b> ) and <b>2</b> ( <b>b</b> ).                                                                                                                                                                      | S6  |
| <b>Table S1.</b> Crystallographic data and structure refinement for <b>1</b> and <b>2</b> .                                                                                                                                                                    | S7  |
| <b>Table S2.</b> Crystallographic data and structure refinement for isostructural complexes <b>3–6</b> .                                                                                                                                                       | S8  |
| <b>Table S3.</b> Selected Bond Distances (Å) and Angles (°) for <b>1</b> and <b>2</b> .                                                                                                                                                                        | S8  |
| <b>Table S4.</b> Continuous Shape Measures calculation for <b>1</b> and <b>2</b> .                                                                                                                                                                             | S9  |
| <b>Table S5.</b> Crystal field parameters for <b>1</b> and <b>2</b> fitted from $\chi_M T$ vs. $T$ and $M$ vs. $H$ data.                                                                                                                                       | S9  |
| <b>Table S6.</b> Substates and corresponding energy levels <b>1</b> and <b>2</b> .                                                                                                                                                                             | S10 |
| <b>Figure S3.</b> Frequency dependence of the in-phase ( $\chi'$ ) and out-of-phase ( $\chi''$ ) ac susceptibility for <b>1</b> at 2 K under the applied static field from 0 to 1500 Oe.                                                                       | S10 |
| <b>Figure S4.</b> Frequency dependence of the in-phase ( $\chi'$ ) and out-of-phase ( $\chi''$ ) ac susceptibility for <b>2</b> at 2 K under the applied static field from 0 to 1500 Oe.                                                                       | S11 |
| <b>Figure S5.</b> Temperature dependence of the in-phase and out-of-phase ac susceptibility data for <b>1</b> under 1000 Oe dc field range from 1.8 to 10 K ( $H_{ac}=1$ Oe).                                                                                  | S11 |
| <b>Figure S6.</b> Temperature dependence of the in-phase and out-of-phase ac susceptibility data for <b>2</b> under 1000 Oe dc field range from 2 to 10 K ( $H_{ac}=1$ Oe).                                                                                    | S12 |
| <b>Figure S7.</b> The Cole-Cole plots at 1.8–4.0 K of <b>1</b> ( <b>a</b> ) and at 1.8–5.0 K of <b>2</b> ( <b>c</b> ) measured under 1000 Oe dc field ( $H_{ac}=1$ Oe), and the red solid lines are the best fitting according to the generalized Debye model. | S12 |

**Table S7.** Relaxation Fitting Parameters from the Least-Square Fitting of the Cole-Cole plots of **1** according to the Generalized Debye Model. S12

**Table S8.** Relaxation Fitting Parameters from the Least-Square Fitting of the Cole-Cole plots of **2** according to the Generalized Debye Model. S13

## Experimental Section

All preparations and manipulations were performed under aerobic conditions. The ligand H<sub>2</sub>valdien was prepared according to a method described previously.<sup>S1</sup> Preparation of **Na(PhO)<sub>2</sub>PO<sub>2</sub>**. (PhO)<sub>2</sub>PO<sub>2</sub>H (10 mmol, 0.25g) was added to the solution of NaOH (10 mmol, 0.4 g) in MeOH (20 mL), then the mixture was vigorously stirred for 2 hours at room temperature. The white solid (Na(PhO)<sub>2</sub>PO<sub>2</sub>) was obtained after evaporating the solution to dryness under reduced pressure without further purification for use directly.

**[DyNa(valdien)Cl((PhO)<sub>2</sub>PO<sub>2</sub>)]<sub>n</sub> (1).** To a solution of H<sub>2</sub>valdien (0.15 mmol, 55 mg), Et<sub>3</sub>N (0.30 mmol, 41.8 μL) in MeOH (3 mL) was added a MeOH solution (2 mL) of DyCl<sub>3</sub>·6H<sub>2</sub>O (0.15 mmol, 57 mg). The solution was stirred for 3 min, and then a MeOH solution (2 mL) of Na(PhO)<sub>2</sub>PO<sub>2</sub> (0.3 mmol, 81 mg) was added to the mixture. The resulting clear yellow solution was stirred briefly and filtered. The yellow block crystals suitable for X-ray diffraction studies were obtained by slow diffusion of isopropyl ether vapour into the yellow solution after 3 days. Yield: *ca.* 45%. Elemental analysis (%) calculated for C<sub>32</sub>H<sub>33</sub>ClDyN<sub>3</sub>NaO<sub>8</sub>P: C, 45.78; H, 3.96; N, 5.01. Found: C, 45.70; H, 3.85; N, 4.96. IR (KBr, cm<sup>-1</sup>): 3439(w), 3200(w), 2916(w), 1626(vs), 1454(s), 1218(s), 1097(s), 899(m) and 741(m).

**[Dy(valdien)((PhO)<sub>2</sub>PO<sub>2</sub>)]<sub>n</sub> (2).** To a solution of H<sub>2</sub>valdien (0.15 mmol, 55 mg), Et<sub>3</sub>N (0.30 mmol, 41.8 μL) and DyCl<sub>3</sub>·6H<sub>2</sub>O (0.15 mmol, 57 mg) in DMF/MeOH (5 mL, v/v = 1/4) was added a DMF/MeOH (5 mL, v/v = 1/4) solution of (PhO)<sub>2</sub>PO<sub>2</sub>H (0.3 mmol, 112 mg) and Et<sub>3</sub>N (0.45 mmol, 62.8 μL). The resulting clear yellow solution was stirred briefly and filtered. The yellow block crystals suitable for X-ray diffraction studies were obtained by slow diffusion of isopropyl ether vapour into the yellow solution after 3 days. Yield: *ca.* 30%. Elemental analysis (%) calculated for C<sub>32</sub>H<sub>33</sub>DyN<sub>3</sub>O<sub>8</sub>P: C, 49.21; H, 4.26; N, 5.38. Found: C, 49.11; H, 4.18; N, 5.22. IR (KBr, cm<sup>-1</sup>): 3432(w), 3231(w), 2927(w), 1626(vs), 1449(m), 1225(vs), 1108(m),

939(m), 859(w), and 739(m).

**[GdNa(valdien)Cl((PhO)<sub>2</sub>PO<sub>2</sub>)<sub>n</sub> (3).** The same procedure was used to synthesize **1** except that DyCl<sub>3</sub>·6H<sub>2</sub>O was used in place of GdCl<sub>3</sub>·6H<sub>2</sub>O. Yield: *ca.* 53%. Elemental analysis (%) calculated for C<sub>32</sub>H<sub>33</sub>ClGdN<sub>3</sub>NaO<sub>8</sub>P: C, 46.07; H, 3.99; N, 5.04. Found: C, 46.14; H, 3.87; N, 5.18. IR (KBr, cm<sup>-1</sup>): 3435(w), 3200(w), 2877(w), 1623(vs), 1450(m), 1220(vs), 1080(m), 901(m), 858(w), and 737(m).

**[TbNa(valdien)Cl((PhO)<sub>2</sub>PO<sub>2</sub>)<sub>n</sub> (4).** The same procedure was used to synthesize **1** except that DyCl<sub>3</sub>·6H<sub>2</sub>O was used in place of TbCl<sub>3</sub>·6H<sub>2</sub>O. Yield: *ca.* 48%. Elemental analysis (%) calculated for C<sub>32</sub>H<sub>33</sub>ClTbN<sub>3</sub>NaO<sub>8</sub>P: C, 45.98; H, 3.99; N, 5.03. Found: C, 45.76; H, 4.03; N, 5.11. IR (KBr, cm<sup>-1</sup>): 3445(w), 3201(w), 2868(w), 1625(vs), 1446(m), 1213(vs), 1096(m), 901(m), 859(w), and 739(m).

**[HoNa(valdien)Cl((PhO)<sub>2</sub>PO<sub>2</sub>)<sub>n</sub> (5).** The same procedure was used to synthesize **1** except that DyCl<sub>3</sub>·6H<sub>2</sub>O was used in place of HoCl<sub>3</sub>·6H<sub>2</sub>O. Yield: *ca.* 42%. Elemental analysis (%) calculated for C<sub>32</sub>H<sub>33</sub>ClHoN<sub>3</sub>NaO<sub>8</sub>P: C, 45.65; H, 3.95; N, 4.99. Found: C, 45.77; H, 4.06; N, 4.88. IR (KBr, cm<sup>-1</sup>): 3430(w), 3200(w), 2862(w), 1623(vs), 1449(m), 1220(vs), 1095(m), 911(m), 852(w), and 737(m).

**[Ho(valdien)((PhO)<sub>2</sub>PO<sub>2</sub>)<sub>n</sub> (6).** The same procedure was used to synthesize **2** except that DyCl<sub>3</sub>·6H<sub>2</sub>O was used in place of HoCl<sub>3</sub>·6H<sub>2</sub>O. Yield: *ca.* 25%. Elemental analysis (%) calculated for C<sub>32</sub>H<sub>33</sub>HoN<sub>3</sub>O<sub>8</sub>P: C, 49.05; H, 4.25; N, 5.36. Found: C, 48.89; H, 4.28; N, 5.22. IR (KBr, cm<sup>-1</sup>): 3440(w), 3236(w), 2857(w), 1618(vs), 1458(m), 1215(vs), 1110(m), 931(m), 854(w), and 732(m).

## Physical Measurements

Elemental analyses were carried out a Vario EL II Elementar. Infrared spectra were obtained on a Thermo Scientific Nicolet IS5 spectrometer. Powder X-ray diffraction (PXRD) were recorded at 298 K on a RINT2000 vertical goniometer with Cu K $\alpha$  X-ray source (operated at 40kV and 100 mA). Magnetic measurements were performed on powdered samples with Quantum Design SQUID VSM magnetometers with field up to 7 T. All data were corrected for diamagnetism and the sample holder and of the constituent atoms using Pascal's constants.<sup>S2</sup>

## **X-ray data collection, structure solution and refinement for 1–6**

The X-ray data of **1–6** were collected on a Bruker APEX II with a CCD area detector ( $\text{MoK}\alpha$  radiation,  $\lambda = 0.71073 \text{ \AA}$ ). The APEX II program was used to determine the unit cell parameters and for data collection. The data were integrated using SAINT<sup>S3</sup> and SADABS.<sup>S4</sup> The structures for two compounds were solved by direct methods and refined by full-matrix least-squares based on  $F^2$  using the SHELXTL program.<sup>S5</sup> All the non-hydrogen atoms were refined anisotropically. Hydrogen atoms of the organic ligands were refined as riding on the corresponding non-hydrogen atoms. Additional details of the data collections and structural refinement parameters are provided in Table S1 (**1** and **2**) and Table S2 (**3–6**). Selected bond lengths and bond angles for **1** and **2** are listed in Table S3. CCDC- 1415417 (**1**), CCDC- 1415418 (**2**), CCDC-1432155 (**3**), CCDC-1432156 (**4**), CCDC-1432157 (**5**) and CCDC-1432220 (**6**) contain the supplementary crystallographic data for this paper. These data can be obtained free of charge from The Cambridge Crystallographic Data Centre via [www.ccdc.cam.ac.uk/data\\_request/cif](http://www.ccdc.cam.ac.uk/data_request/cif).

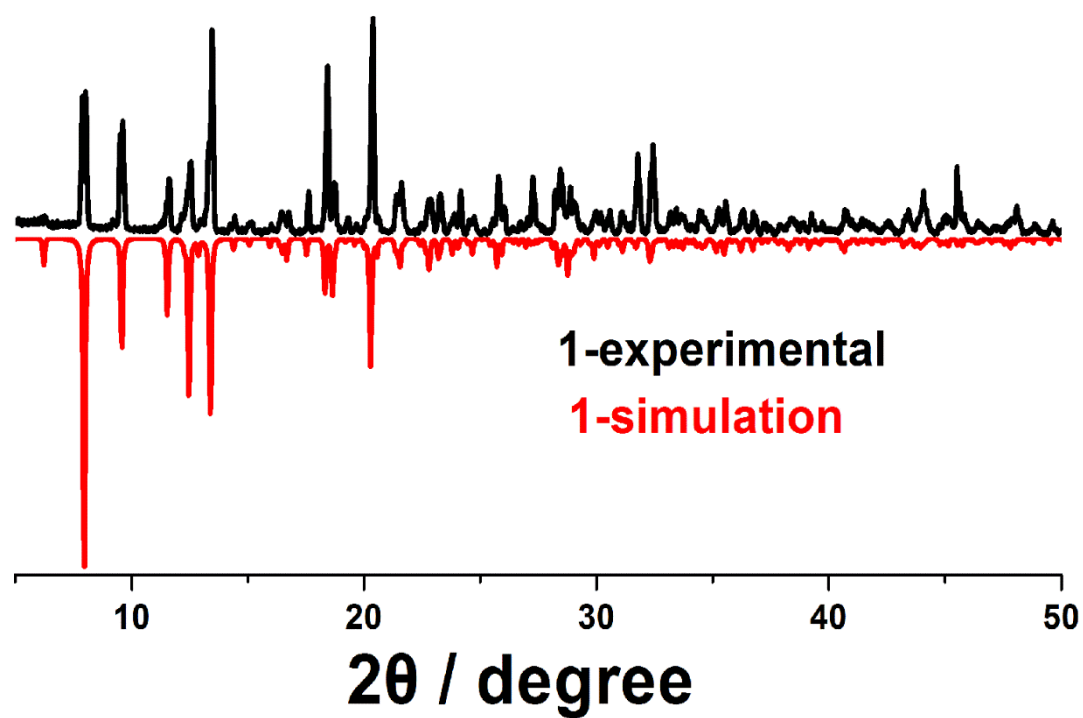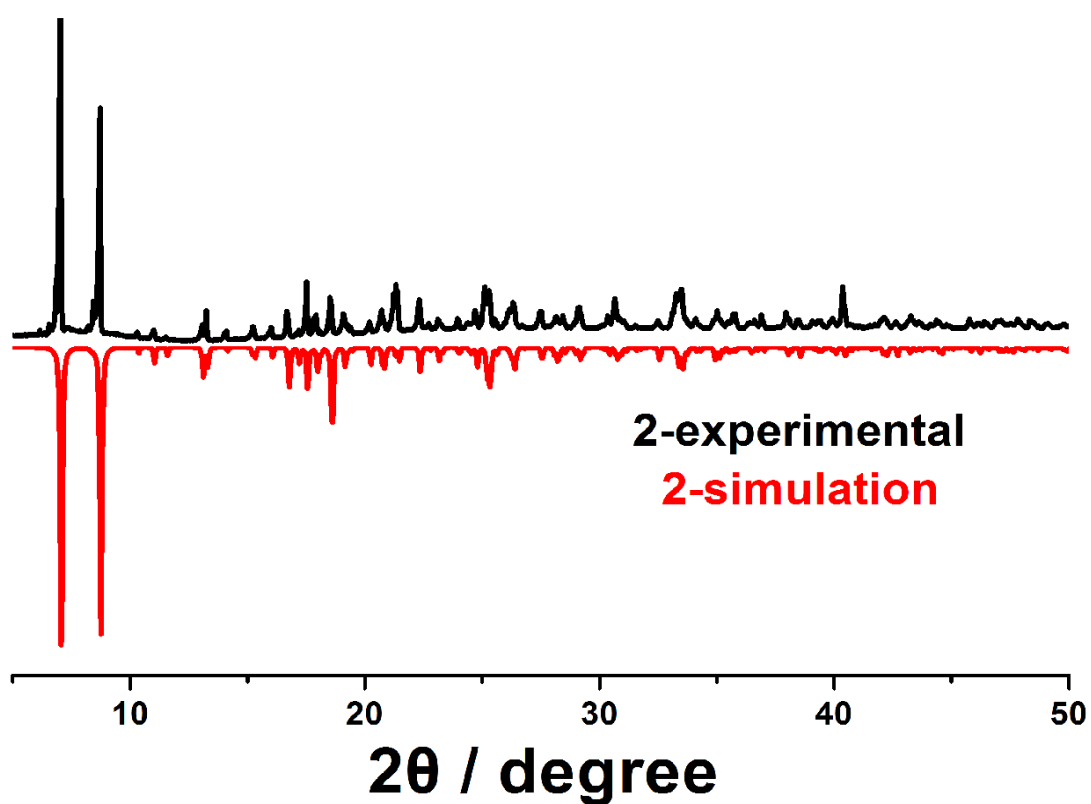

**Figure S1.** The powder XRD patterns for compound 1 and 2. The pattern simulated from the single crystal data of compound 1 and 2 are also given.

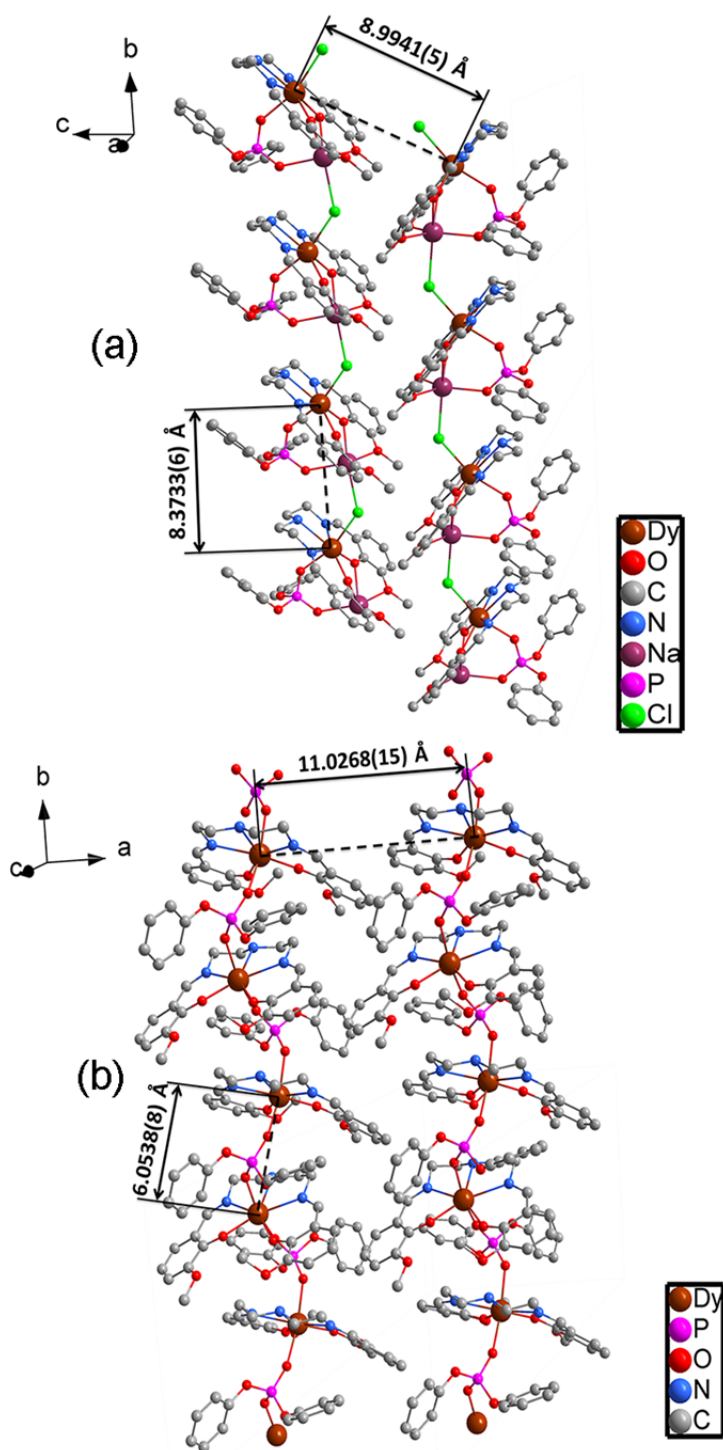

**Figure S2.** The crystal packing of **1** (a) and **2** (b). The shortest distances of Dy···Dy in the chain for **1** (a) and **2** (b) are 8.3733(6) and 6.0538(8) Å, respectively. And the nearest distances of Dy···Dy between the chain for **1** (a) and **2** (b) are 8.9941(5) and 11.0268(15) Å, respectively.

**Table S1.** Crystallographic data and structure refinement for **1** and **2**.

| complex                                                                                                        | <b>1</b>                                                              | <b>2</b>                                                          |
|----------------------------------------------------------------------------------------------------------------|-----------------------------------------------------------------------|-------------------------------------------------------------------|
| Formula                                                                                                        | DyNaC <sub>32</sub> H <sub>33</sub> N <sub>3</sub> O <sub>8</sub> ClP | DyC <sub>32</sub> H <sub>33</sub> N <sub>3</sub> O <sub>8</sub> P |
| <i>Mr</i> [g mol <sup>-1</sup> ]                                                                               | 839.52                                                                | 781.08                                                            |
| CCDC number                                                                                                    | 1415417                                                               | 1415418                                                           |
| Crystal size [mm <sup>3</sup> ]                                                                                | 0.54×0.50×0.48                                                        | 0.24×0.21×0.16                                                    |
| Crystal system                                                                                                 | Orthorhombic                                                          | Monoclinic                                                        |
| Space group                                                                                                    | <i>P bca</i>                                                          | <i>P 2<sub>1</sub>/c</i>                                          |
| <i>a</i> [Å]                                                                                                   | 22.2015(14)                                                           | 11.0268(15)                                                       |
| <i>b</i> [Å]                                                                                                   | 8.3733(5)                                                             | 11.6462(16)                                                       |
| <i>c</i> [Å]                                                                                                   | 36.918(2)                                                             | 27.317(3)                                                         |
| $\alpha$ [°]                                                                                                   | 90                                                                    | 90                                                                |
| $\beta$ [°]                                                                                                    | 90                                                                    | 113.808(4)                                                        |
| $\gamma$ [°]                                                                                                   | 90                                                                    | 90                                                                |
| <i>V</i> [Å <sup>3</sup> ]                                                                                     | 6863.0(7)                                                             | 3209.5(7)                                                         |
| <i>Z</i>                                                                                                       | 8                                                                     | 4                                                                 |
| <i>T</i> , K                                                                                                   | 293(2)                                                                | 293(2)                                                            |
| $\rho_{\text{calcd}}$ [g cm <sup>-3</sup> ]                                                                    | 1.625                                                                 | 1.616                                                             |
| $\mu$ (Mo– <i>K</i> $\alpha$ ) [mm <sup>-1</sup> ]                                                             | 2.368                                                                 | 2.432                                                             |
| <i>F</i> (000)                                                                                                 | 3352                                                                  | 1564                                                              |
| $\theta$ range [°]                                                                                             | 1.83 – 27.63                                                          | 1.93 – 27.62                                                      |
| Refl. collected / unique                                                                                       | 43751 / 7952                                                          | 20718 / 7318                                                      |
| R(int)                                                                                                         | 0.0311                                                                | 0.0537                                                            |
| <i>T</i> <sub>max</sub> / <i>T</i> <sub>min</sub>                                                              | 0.3961 / 0.3613                                                       | 0.6969 / 0.5929                                                   |
| Data/restraints/parameters                                                                                     | 7952 / 0 / 430                                                        | 7318 / 0 / 408                                                    |
| <i>R</i> <sub>1</sub> <sup>a</sup> / <i>wR</i> <sub>2</sub> <sup>b</sup> ( <i>I</i> > 2 $\sigma$ ( <i>I</i> )) | 0.0403 / 0.0792                                                       | 0.0390 / 0.0808                                                   |
| <i>R</i> <sub>1</sub> / <i>wR</i> <sub>2</sub> (all data)                                                      | 0.0496 / 0.0823                                                       | 0.0678 / 0.1016                                                   |
| GOF on <i>F</i> <sup>2</sup>                                                                                   | 1.239                                                                 | 1.032                                                             |
| Max/min [e Å <sup>-3</sup> ]                                                                                   | 1.391 / -1.942                                                        | 0.725 / -0.953                                                    |

$$^a R_1 = \sum ||F_o| - |F_c|| / \sum |F_o|. \quad ^b wR_2 = \{ \sum [w(F_o^2 - F_c^2)^2] / \sum [w(F_o^2)^2] \}^{1/2}$$

**Table S2.** Crystallographic data and structure refinement for isostructural complexes **3–6**.

| complex                                                                                                        | <b>3</b>                                                              | <b>4</b>                                                              | <b>5</b>                                                | <b>6</b>                                                          |
|----------------------------------------------------------------------------------------------------------------|-----------------------------------------------------------------------|-----------------------------------------------------------------------|---------------------------------------------------------|-------------------------------------------------------------------|
| Formula                                                                                                        | GdNaC <sub>32</sub> H <sub>33</sub> ClN <sub>3</sub> O <sub>8</sub> P | TbNaC <sub>32</sub> H <sub>33</sub> N <sub>3</sub> O <sub>8</sub> CIP | HoNaC <sub>32</sub> H <sub>33</sub> NO <sub>8</sub> CIP | HoC <sub>32</sub> H <sub>33</sub> N <sub>3</sub> O <sub>8</sub> P |
| <i>Mr</i> [g mol <sup>-1</sup> ]                                                                               | 834.27                                                                | 835.94                                                                | 841.95                                                  | 783.51                                                            |
| CCDC number                                                                                                    | 1432155                                                               | 1432156                                                               | 1432157                                                 | 1432220                                                           |
| Crystal size [mm <sup>3</sup> ]                                                                                | 0.32 × 0.31 × 0.28                                                    | 0.54 × 0.46 × 0.35                                                    | 0.41 × 0.22 × 0.10                                      | 0.24 × 0.20 × 0.14                                                |
| Crystal system                                                                                                 | Orthorhombic                                                          | Orthorhombic                                                          | Orthorhombic                                            | Monoclinic                                                        |
| Space group                                                                                                    | <i>P bca</i>                                                          | <i>P bca</i>                                                          | <i>P bca</i>                                            | <i>P 2<sub>1</sub>/c</i>                                          |
| <i>a</i> [Å]                                                                                                   | 22.267(3)                                                             | 22.2076(17)                                                           | 22.220(4)                                               | 10.990(2)                                                         |
| <i>b</i> [Å]                                                                                                   | 8.4192(13)                                                            | 8.4021(7)                                                             | 8.3683(16)                                              | 11.579(2)                                                         |
| <i>c</i> [Å]                                                                                                   | 36.839(6) A                                                           | 36.877(3)                                                             | 36.890(7)                                               | 27.216(5)                                                         |
| $\alpha$ [°]                                                                                                   | 90.00                                                                 | 90.00                                                                 | 90.00                                                   | 90.00                                                             |
| $\beta$ [°]                                                                                                    | 90.00                                                                 | 90.00                                                                 | 90.00                                                   | 113.817(6)                                                        |
| $\gamma$ [°]                                                                                                   | 90.00                                                                 | 90.00                                                                 | 90.00                                                   | 90.00                                                             |
| <i>V</i> [Å <sup>3</sup> ]                                                                                     | 6906.3(18)                                                            | 6880.9(10)                                                            | 6859(2)                                                 | 3168.4(10)                                                        |
| <i>Z</i>                                                                                                       | 8                                                                     | 8                                                                     | 8                                                       | 4                                                                 |
| <i>T</i> , K                                                                                                   | 293(2)                                                                | 293(2)                                                                | 293(2)                                                  | 293(2)                                                            |
| $\rho_{\text{calcd}}$ [g cm <sup>-3</sup> ]                                                                    | 1.605                                                                 | 1.614                                                                 | 1.631                                                   | 1.643                                                             |
| $\mu$ (Mo- <i>K</i> $\alpha$ ) [mm <sup>-1</sup> ]                                                             | 2.110                                                                 | 2.245                                                                 | 2.497                                                   | 2.603                                                             |
| <i>F</i> (000)                                                                                                 | 3336                                                                  | 3344                                                                  | 3360                                                    | 1568                                                              |
| $\theta$ range [°]                                                                                             | 2.14 – 27.47                                                          | 2.14 – 27.45                                                          | 1.43 – 27.47                                            | 1.94 – 26.00                                                      |
| Refl. collected / unique                                                                                       | 42211 / 7834                                                          | 41969 / 7836                                                          | 42754 / 7821                                            | 33248 / 5992                                                      |
| R(int)                                                                                                         | 0.0438                                                                | 0.0575                                                                | 0.0726                                                  | 0.0367                                                            |
| <i>T</i> <sub>max</sub> / <i>T</i> <sub>min</sub>                                                              | 0.5896 / 0.5517                                                       | 0.5071 / 0.3769                                                       | 0.7883 / 0.4275                                         | 0.7120 / 0.5739                                                   |
| Data/restraints/<br>parameters                                                                                 | 7834 / 0 / 426                                                        | 7836 / 0 / 426                                                        | 7821 / 0 / 426                                          | 6206 / 144 / 408                                                  |
| <i>R</i> <sub>1</sub> <sup>a</sup> / <i>wR</i> <sub>2</sub> <sup>b</sup> ( <i>I</i> > 2 $\sigma$ ( <i>I</i> )) | 0.0415 / 0.0738                                                       | 0.0425 / 0.0777                                                       | 0.0367 / 0.0852                                         | 0.0357 / 0.0744                                                   |
| <i>R</i> <sub>1</sub> / <i>wR</i> <sub>2</sub> (all data)                                                      | 0.0561 / 0.0778                                                       | 0.0651 / 0.0842                                                       | 0.0722 / 0.1134                                         | 0.0480 / 0.0798                                                   |
| GOF on <i>F</i> <sup>2</sup>                                                                                   | 1.173                                                                 | 1.077                                                                 | 1.014                                                   | 1.064                                                             |
| Max/min [e Å <sup>-3</sup> ]                                                                                   | 0.821 / -2.064                                                        | 1.045 / -1.489                                                        | 0.532 / -0.697                                          | 1.460 / -1.869                                                    |

$$^a R_1 = \sum ||F_o| - |F_c|| / \sum |F_o|. \quad ^b wR_2 = \{ \sum [w(F_o^2 - F_c^2)^2] / \sum [w(F_o^2)^2] \}^{1/2}$$

**Table S3.** Selected Bond Lengths (Å) and Angles (°) for **1** and **2**.

| <b>1</b> |          |           |            |            |            |
|----------|----------|-----------|------------|------------|------------|
| Dy1-O1   | 2.211(3) | O1-Dy1-O5 | 89.49(10)  | O3-Dy1-N3  | 72.36(11)  |
| Dy1-O3   | 2.232(3) | O3-Dy1-O5 | 89.06(10)  | O5-Dy1-N3  | 85.95(11)  |
| Dy1-O5   | 2.294(3) | O1-Dy1-N2 | 140.60(11) | N2-Dy1-N3  | 68.06(12)  |
| Dy1-N2   | 2.493(3) | O3-Dy1-N2 | 139.34(11) | N1-Dy1-N3  | 136.42(12) |
| Dy1-N1   | 2.515(4) | O5-Dy1-N2 | 79.41(10)  | O1-Dy1-Cl1 | 103.71(8)  |
| Dy1-N3   | 2.530(4) | O1-Dy1-N1 | 73.31(11)  | O3-Dy1-Cl1 | 104.32(8)  |



|                     |            |                         |            |                         |            |
|---------------------|------------|-------------------------|------------|-------------------------|------------|
| Dy1-Cl1             | 2.6390(12) | O3-Dy1-N1               | 150.16(11) | O5-Dy1-Cl1              | 162.87(7)  |
| Dy1-Na1             | 3.6270(16) | O5-Dy1-N1               | 86.20(11)  | N2-Dy1-Cl1              | 83.46(8)   |
|                     |            | N2-Dy1-N1               | 68.36(12)  | N1-Dy1-Cl1              | 87.21(9)   |
| O1-Dy1-O3           | 77.21(10)  | O1-Dy1-N3               | 149.28(11) | N3-Dy1-Cl1              | 87.98(9)   |
| O1-Dy1-Na1          | 40.57(8)   | O3-Dy1-Na1              | 40.83(8)   | O5-Dy1-Na1              | 75.05(7)   |
| N2-Dy1-Na1          | 154.46(8)  | N1-Dy1-Na1              | 109.82(9)  | N3-Dy1-Na1              | 109.30(9)  |
| Cl1-Dy1-Na1         | 122.08(4)  |                         |            |                         |            |
| <b>2</b>            |            |                         |            |                         |            |
| Dy1-O1              | 2.197(3)   | O1-Dy1-O6 <sup>a</sup>  | 99.69(13)  | N3-Dy1-N2               | 66.78(14)  |
| Dy1-O3              | 2.202(3)   | O3-Dy1-O6 <sup>a</sup>  | 91.83(13)  | O1-Dy1-N1               | 72.52(14)  |
| Dy1-O5              | 2.261(3)   | O5-Dy1-O6 <sup>a</sup>  | 163.10(13) | O3-Dy1-N1               | 153.81(14) |
| Dy1-O6 <sup>a</sup> | 2.279(3)   | O1-Dy1-N3               | 152.56(14) | O5-Dy1-N1               | 86.58(13)  |
| Dy1-N3              | 2.532(4)   | O3-Dy1-N3               | 71.56(14)  | O6 <sup>a</sup> -Dy1-N1 | 85.61(13)  |
| Dy1-N2              | 2.533(4)   | O5-Dy1-N3               | 85.28(13)  | N3-Dy1-N1               | 134.35(15) |
| Dy1-N1              | 2.536(4)   | O6 <sup>a</sup> -Dy1-N3 | 89.50(13)  | N2-Dy1-N1               | 67.59(14)  |
|                     |            | O1-Dy1-N2               | 139.87(14) | O3-Dy1-O5               | 101.69(13) |
| O1-Dy1-O5           | 92.21(13)  | O3-Dy1-N2               | 137.85(13) | O6 <sup>a</sup> -Dy1-N2 | 81.83(13)  |
| O1-Dy1-O3           | 82.28(13)  | O5-Dy1-N2               | 81.33(14)  |                         |            |

Symmetry transformations used to generate equivalent atoms: <sup>a</sup> x, y-1, z

**Table S4.** Continuous Shape Measures calculation for **1** and **2**.

| Structure [ML7] | HP-7   | HPY-7  | PBPY-7 | COC-7 | CTPR-7 | JPBPY-7 | JETPY-7 |
|-----------------|--------|--------|--------|-------|--------|---------|---------|
| 1               | 33.490 | 25.169 | 0.775  | 8.133 | 6.113  | 4.712   | 23.157  |
| 2               | 33.887 | 24.701 | 0.496  | 6.561 | 4.970  | 3.056   | 23.699  |

HP-7 1 D7h Heptagon; HPY-7 2 C6v Hexagonal pyramid;

PBPY-7 3 D5h Pentagonal bipyramid; COC-7 4 C3v Capped octahedron;

CTPR-7 5 C2v Capped trigonal prism; JPBPY-7 6 D5h Johnson pentagonal bipyramid J13;

JETPY-7 7 C3v Johnson elongated triangular pyramid J7

**Table S5.** Crystal field parameters and anisotropy g-factors for **1** and **2** fitted from  $\chi_M T$  vs.  $T$  and  $M$  vs.  $H$  data.

|          | <b>1</b> | <b>2</b> |
|----------|----------|----------|
| $B_2^0$  | -21.203  | -17.096  |
| $B_4^0$  | -36.539  | -26.606  |
| $B_6^0$  | 56.616   | 55.275   |
| $g_x$    | 1.320    | 1.927    |
| $g_y$    | 1.373    | 0.128    |
| $g_z$    | 1.189    | 1.342    |
| Residual | 0.038    | 0.041    |

**Table S6.** The substates and corresponding energy levels **1** and **2**.

| <b>1</b>      |                     | <b>2</b>      |                     |
|---------------|---------------------|---------------|---------------------|
| $ m_j\rangle$ | $E(\text{cm}^{-1})$ | $ m_j\rangle$ | $E(\text{cm}^{-1})$ |
| $\pm 13/2$    | 0                   | $\pm 13/2$    | 0                   |
| $\pm 11/2$    | 41.63               | $\pm 11/2$    | 45.65               |
| $\pm 1/2$     | 53.49               | $\pm 1/2$     | 46.09               |
| $\pm 3/2$     | 87.11               | $\pm 3/2$     | 80.71               |
| $\pm 9/2$     | 119.8               | $\pm 9/2$     | 122.0               |
| $\pm 5/2$     | 131.8               | $\pm 5/2$     | 127.5               |
| $\pm 7/2$     | 152.3               | $\pm 7/2$     | 151.0               |
| $\pm 15/2$    | 200.7               | $\pm 15/2$    | 183.3               |

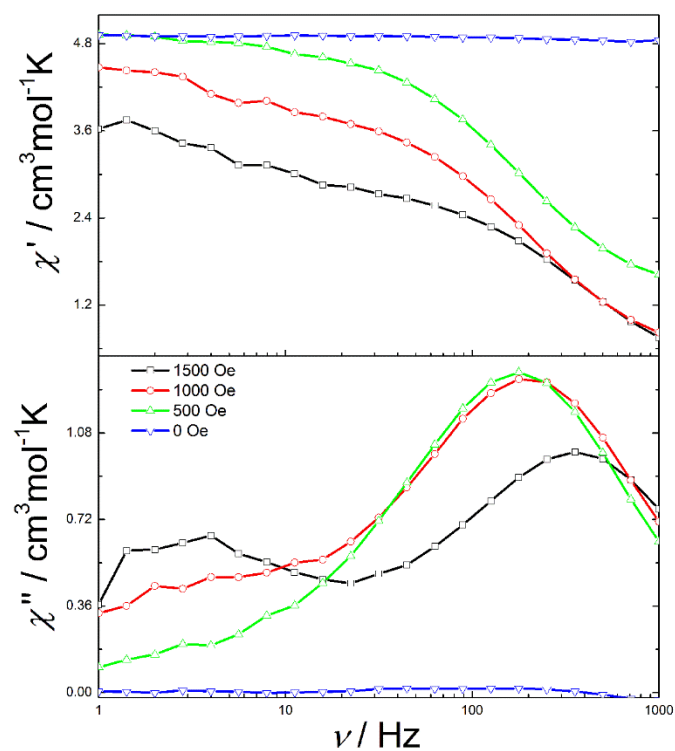

**Figure S3.** Frequency dependence of the in-phase ( $\chi'$ ) and out-of-phase ( $\chi''$ ) ac susceptibility for **1** at 2 K under the applied static field from 0 to 1500 Oe. The solid lines are a guide for the eye.

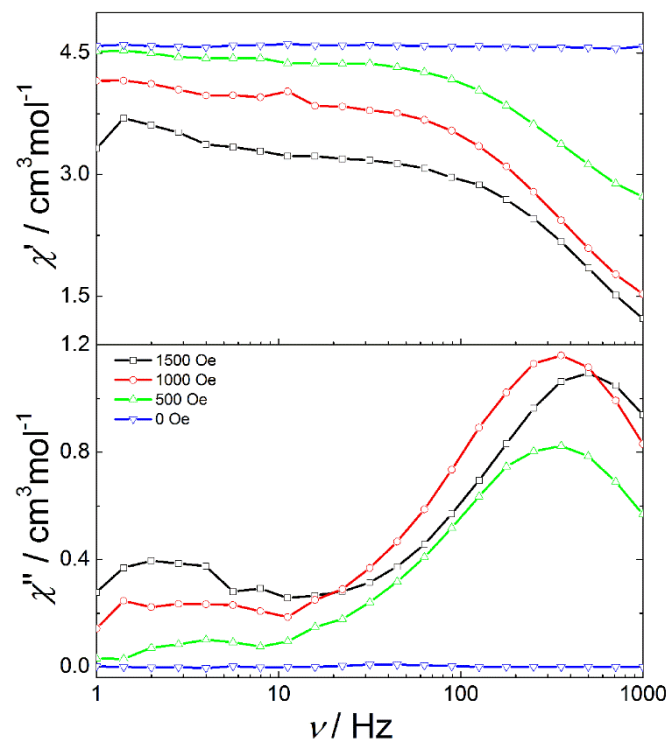

**Figure S4.** Frequency dependence of the in-phase ( $\chi'$ ) and out-of-phase ( $\chi''$ ) ac susceptibility for **2** at 2 K under the applied static field from 0 to 1500 Oe. The solid lines are a guide for the eye.

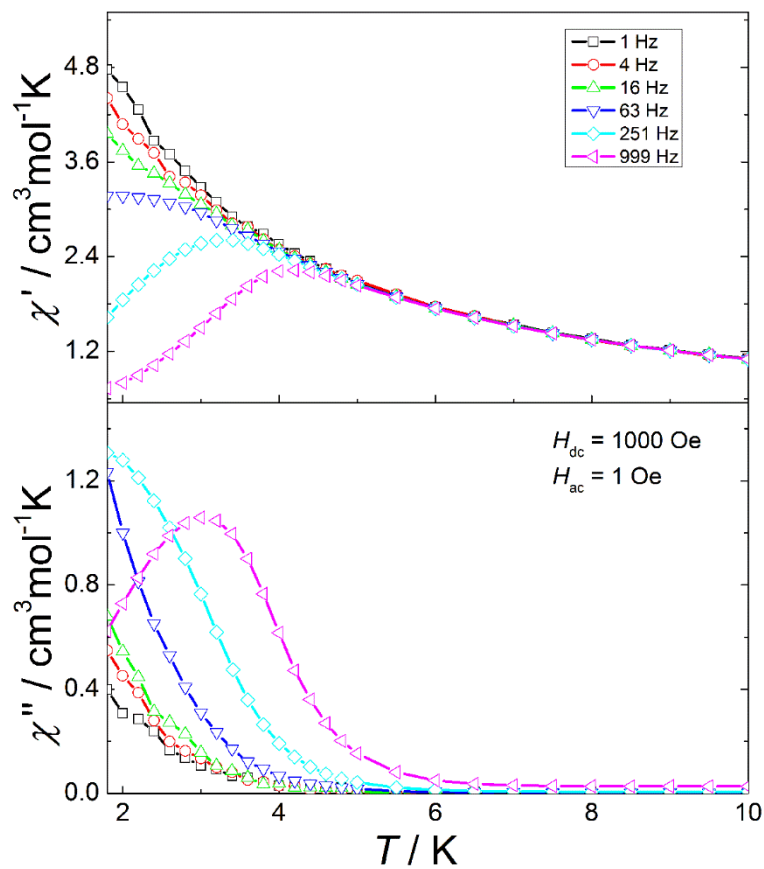

**Figure S5.** Temperature dependence of the in-phase and out-of-phase ac susceptibility data for **1** under 1000 Oe dc field range from 1.8 to 10 K ( $H_{ac} = 1$  Oe). The solid lines are a guide for the eye.

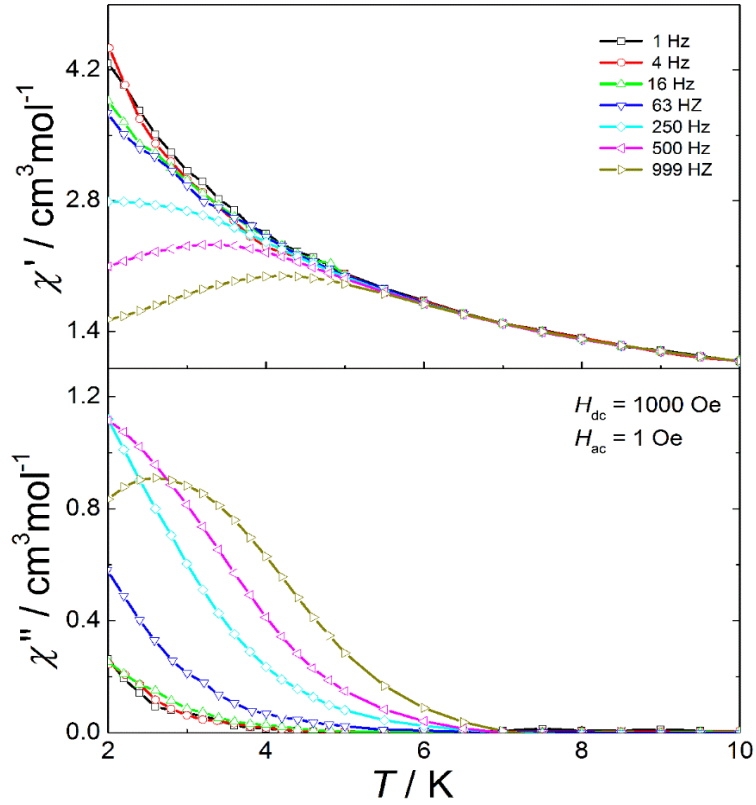

**Figure S6.** Temperature dependence of the in-phase and out-of-phase ac susceptibility data for **2** under 1000 Oe dc field range from 2 to 10 K ( $H_{ac} = 1$  Oe). The solid lines are a guide for the eye.

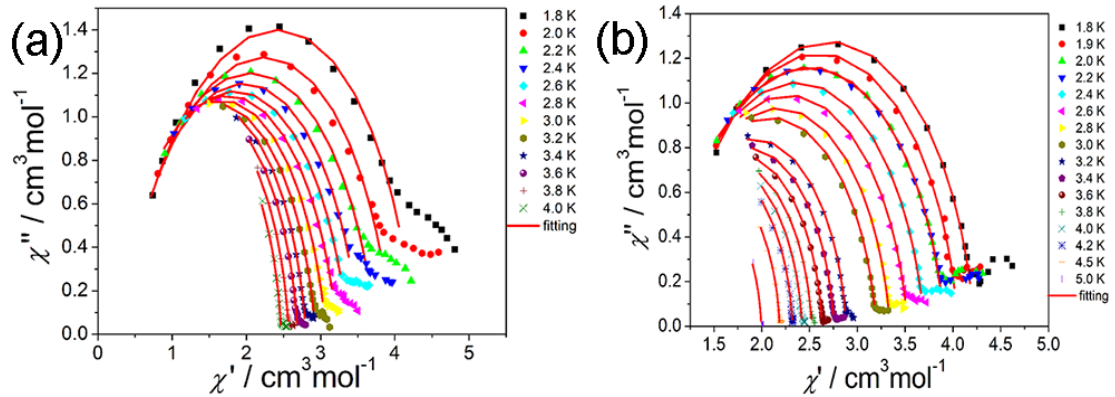

**Figure S7.** The Cole-Cole plots at 1.8–4.0 K of **1** (a) and at 1.8–5.0 K of **2** (c) measured under 1000 Oe dc field ( $H_{ac} = 1$  Oe), and the red solid lines are the best fitting according to the generalized Debye model.

**Table S7.** Relaxation Fitting Parameters from the Least-Square Fitting of the Cole-Cole plots of **1** according to the Generalized Debye Model.<sup>a</sup>

| Temperature / K | $\chi_S / \text{cm}^3 \text{mol}^{-1} \text{K}$ | $\chi_T / \text{cm}^3 \text{mol}^{-1} \text{K}$ | $\tau / \text{s}$ | $\alpha$ |
|-----------------|-------------------------------------------------|-------------------------------------------------|-------------------|----------|
| 1.8             | 0.3007                                          | 4.26079                                         | 0.00125           | 0.21613  |
| 2.0             | 0.24872                                         | 3.96021                                         | 9E-4              | 0.23388  |
| 2.2             | 0.08                                            | 3.75                                            | 6.3E-4            | 0.26204  |
| 2.4             | 0.17654                                         | 3.52561                                         | 4.8E-4            | 0.23201  |
| 2.6             | 0.09349                                         | 3.37062                                         | 3.4E-4            | 0.23747  |

|     |         |         |        |         |
|-----|---------|---------|--------|---------|
| 2.8 | 0.05413 | 3.2255  | 2.5E-4 | 0.22901 |
| 3.0 | 0.07196 | 3.07289 | 1.9E-4 | 0.20791 |
| 3.2 | 0.07427 | 2.93357 | 1.4E-4 | 0.18789 |
| 3.4 | 0.09215 | 2.80117 | 1E-4   | 0.15851 |
| 3.6 | 0.12008 | 2.69382 | 8E-5   | 0.14092 |
| 3.8 | 0.15747 | 2.57161 | 6E-5   | 0.11322 |
| 4.0 | 0.15366 | 2.46967 | 4E-5   | 0.09959 |

<sup>a</sup>The Generalized Debye equation:  $\chi'' = (\chi_S - \chi_T) \tanh[\alpha\pi/2]/2 + \{(\chi' - \chi_S)(\chi_T - \chi') + (\chi_T - \chi_S)^2 \tanh^2[\alpha\pi/2]/4\}^{1/2}$  (1), where  $\chi_S$  is the adiabatic magnetic susceptibility and  $\chi_T$  is the isothermal magnetic susceptibility;  $\chi'$  is in-phase susceptibility and  $\chi''$  is out-of-phase susceptibility.

**Table S8.** Relaxation Fitting Parameters from the Least-Square Fitting of the Cole-Cole plots of **2** according to the Generalized Debye Model. <sup>a</sup>

| Temperature / K | $\chi_S / \text{cm}^3 \text{mol}^{-1} \text{K}$ | $\chi_T / \text{cm}^3 \text{mol}^{-1} \text{K}$ | $\tau / \text{s}$ | $\alpha$ |
|-----------------|-------------------------------------------------|-------------------------------------------------|-------------------|----------|
| 1.8             | 1.05191                                         | 4.22402                                         | 5.9E-4            | 0.13751  |
| 1.9             | 1.00641                                         | 4.0556                                          | 5.3E-4            | 0.13933  |
| 2.0             | 0.91727                                         | 3.91552                                         | 4.8E-4            | 0.16110  |
| 2.2             | 0.94394                                         | 3.90885                                         | 4E-4              | 0.15365  |
| 2.4             | 0.89640                                         | 3.70188                                         | 3.3E-4            | 0.15746  |
| 2.6             | 0.91505                                         | 3.52592                                         | 2.9E-4            | 0.14628  |
| 2.8             | 0.90774                                         | 3.34191                                         | 2.4E-4            | 0.13855  |
| 3.0             | 0.90059                                         | 3.19673                                         | 2E-4              | 0.12951  |
| 3.2             | 0.89943                                         | 2.88249                                         | 1.7E-4            | 0.10524  |
| 3.4             | 0.90184                                         | 2.75335                                         | 1.5E-4            | 0.09352  |
| 3.6             | 0.88372                                         | 2.63081                                         | 1.3E-4            | 0.08295  |
| 3.8             | 0.85160                                         | 2.52265                                         | 1E-4              | 0.08740  |
| 4.0             | 0.78402                                         | 2.42057                                         | 9E-5              | 0.08155  |
| 4.2             | 0.74374                                         | 2.32119                                         | 7E-5              | 0.07072  |
| 4.5             | 0.68980                                         | 2.18606                                         | 5E-5              | 0.06711  |
| 5.0             | 0.68457                                         | 1.99502                                         | 3E-5              | 0.06768  |

## Reference

- (S1) J. Long, F. Habib, P.-H. Lin, I. Korobkov, G. Enright, L. Ungur, W. Wernsdorfer, L. F. Chibotaru and M. Murugesu, *J. Am. Chem. Soc.*, 2011, **133**, 5319.
- (S2) O. Kahn, *Molecular Magnetism*, VCH Publishers, Inc., New York, 1993, 2.
- (S3) *SAINTE* Version 7.68A, Bruker AXS, Inc.; Madison, WI 2009.
- (S4) G. M. Sheldrick, *SADABS*, Version 2008/1, Bruker AXS, Inc.; Madison, WI 2008.
- (S5) G. M. Sheldrick, *SHELXTL*, Version 6.14, Bruker AXS, Inc.; Madison, WI 2000-2003.
